# Supplementary material for: Determination of phase behaviour in all protein blend materials with multivariate FTIR imaging technique
Source: Royal Society of Chemistry journal article supplement (doi:10.1039/c4tb01808g), 2014-11-19
Supplement: c4tb01808g1.pdf [file c4tb01808g1.pdf]

## Supporting Information

### Determination of Phase Behaviour in All Protein Blend Materials with Multivariate FTIR Imaging Technique

Shengjie Ling,<sup>a</sup> Zeming Qi<sup>b</sup>, Zhengzhong Shao<sup>a</sup> and Xin Chen<sup>\*a</sup>

<sup>a</sup>State Key Laboratory of Molecular Engineering of Polymers, Department of Macromolecular Science, Laboratory of Advanced Materials, Fudan University, Shanghai, 200433, People's Republic of China. Fax: 86 21 5163 0300; Tel: 86 21 6564 2866; E-mail: chenx@fudan.edu.cn

<sup>b</sup>National Synchrotron Radiation Laboratory, University of Science and Technology of China, Hefei, 230029, People's Republic of China

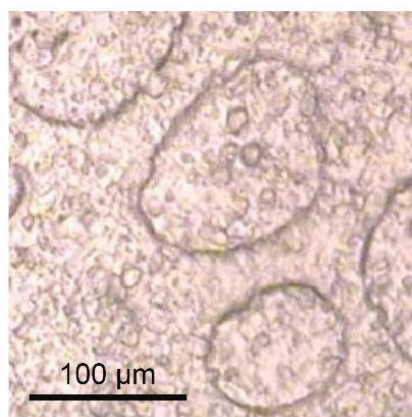

**Fig. S1** Optical micrograph image of SF/SPI blend film.

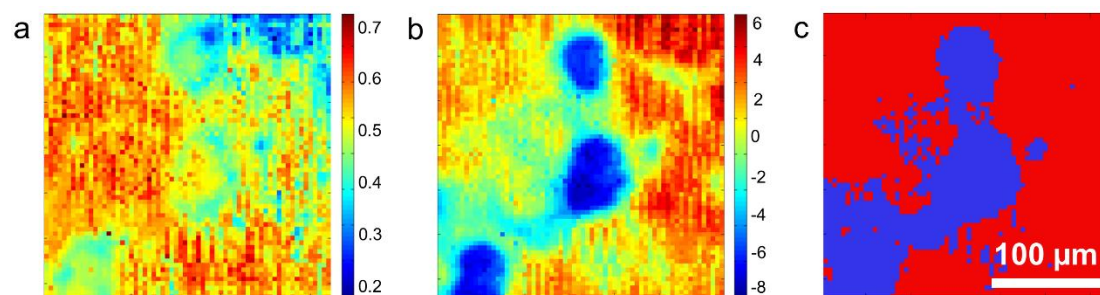

**Fig. S2** FTIR images of *Antheraea pernyi* silk fibroin/collagen blend film. (a)  $A_{\text{amide III}}/A_{\text{amide II}}$  image; (b) PCA image; (c) clustering analysis image. Mass ratio of *A. pernyi* silk fibroin/collagen = 20/80. The blue colour represents silk fibroin-rich region and the red colour represents collagen-rich region.
